# Supplementary material for: Anti-Inflammatory Efficacy of Resveratrol-Enriched Rice Callus Extract on Lipopolysaccharide-Stimulated RAW264.7 Macrophages
Source: MDPI journal article supplement (doi:10.3390/immuno4020009), 2024-04-03
Supplement: s1 [file s1]

Supplementary Materials

**Figure S1.** Sample chromatographs (left panel) and calibration standard curves for piceid (right upper panel) and resveratrol (right lower panel).

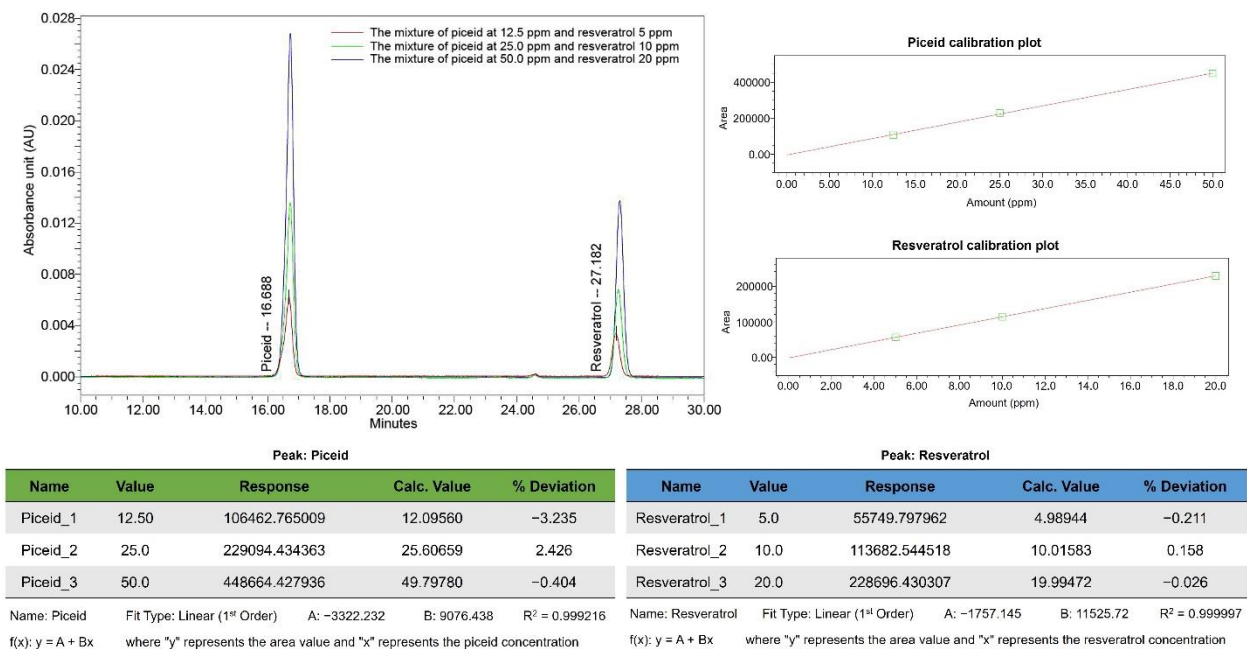

**Figure S2.** The standard curve of sodium nitrite

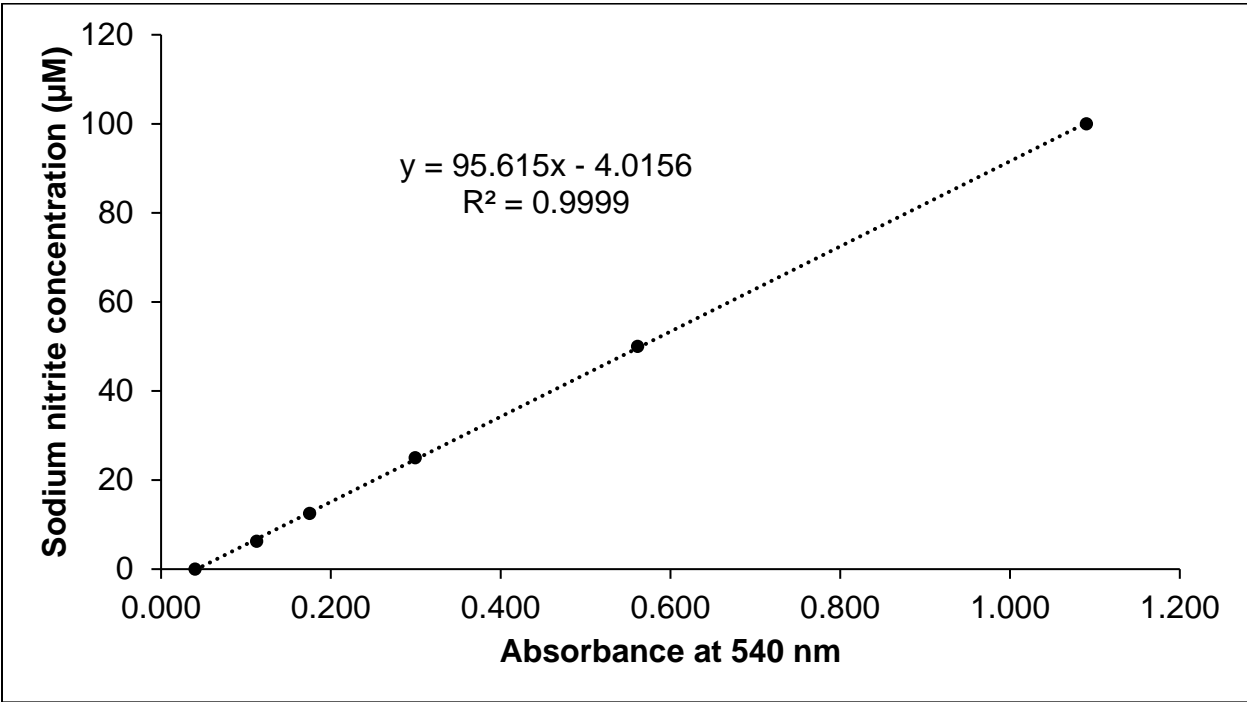

**Figure S3.** Standard curve of PGE<sub>2</sub> production

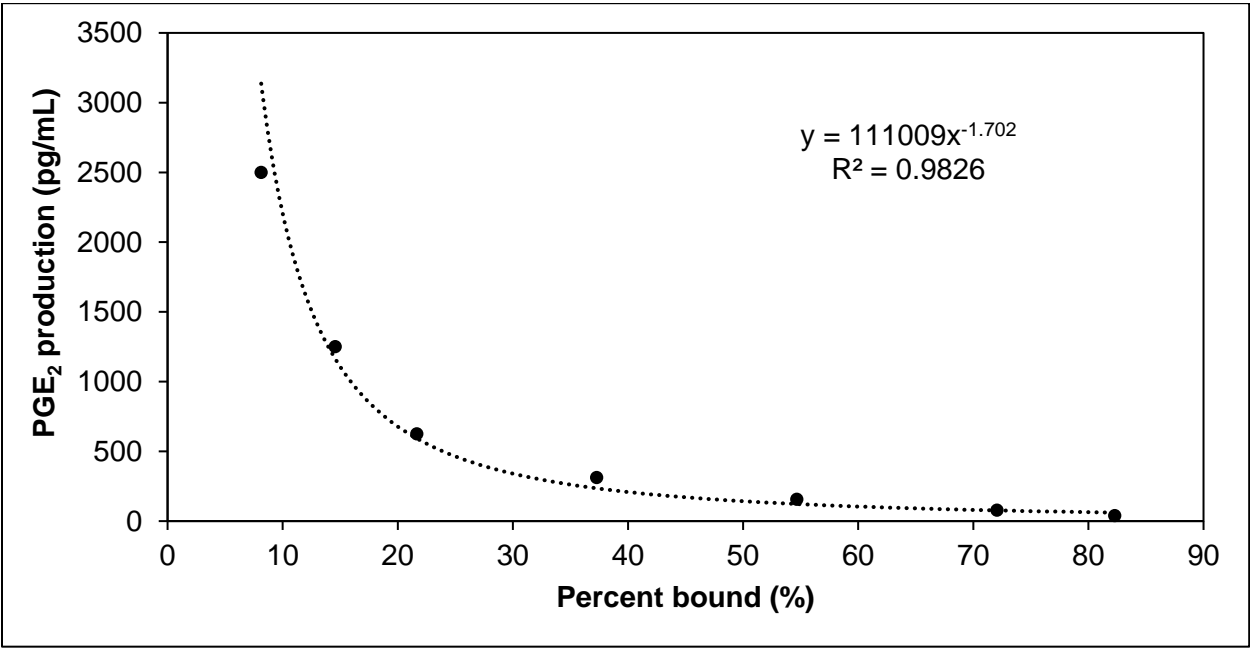

**Figure S4.** The expression levels of pro-inflammatory associated genes in the RPMI-, DJ-, and DJ526-treated cells. Letters (a-c) indicate significant differences ( $p < 0.05$ ) between treatments (where  $a > b > c$ ).

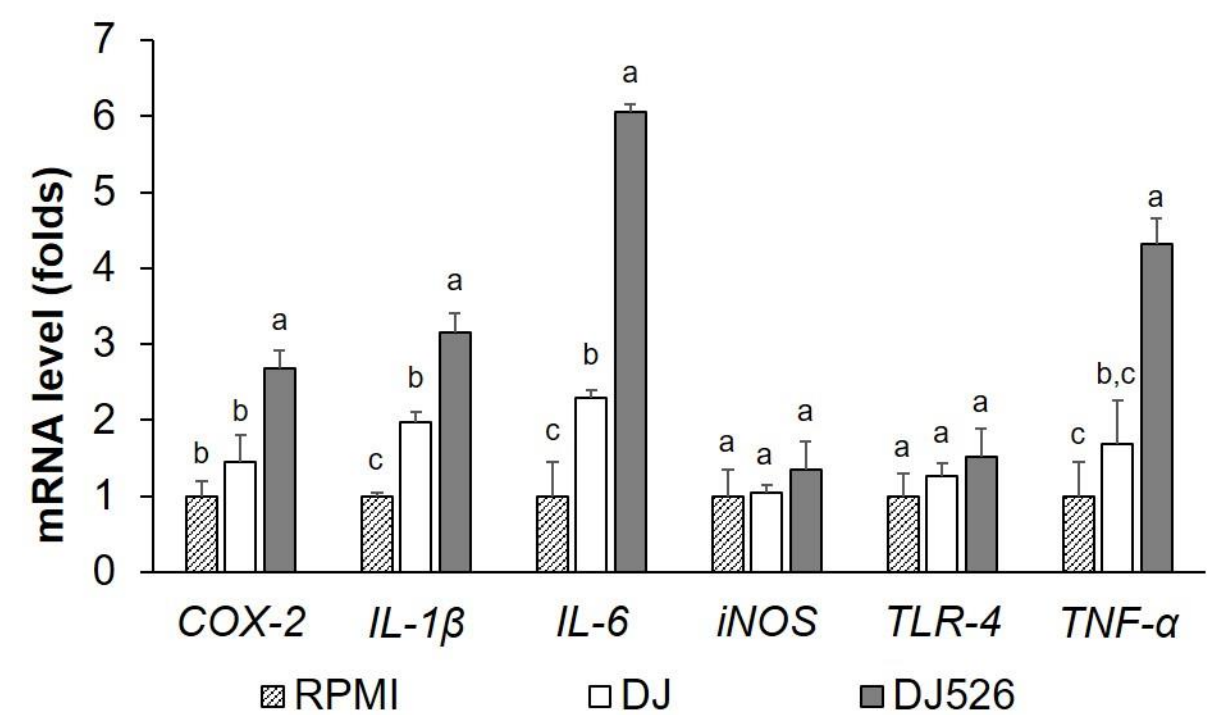

**Figure S5.** Pearson's correlation analyses between the amount of resveratrol (piceid + resveratrol) and mRNA levels (degree of freedom = 22 and  $p = 0.01$ )

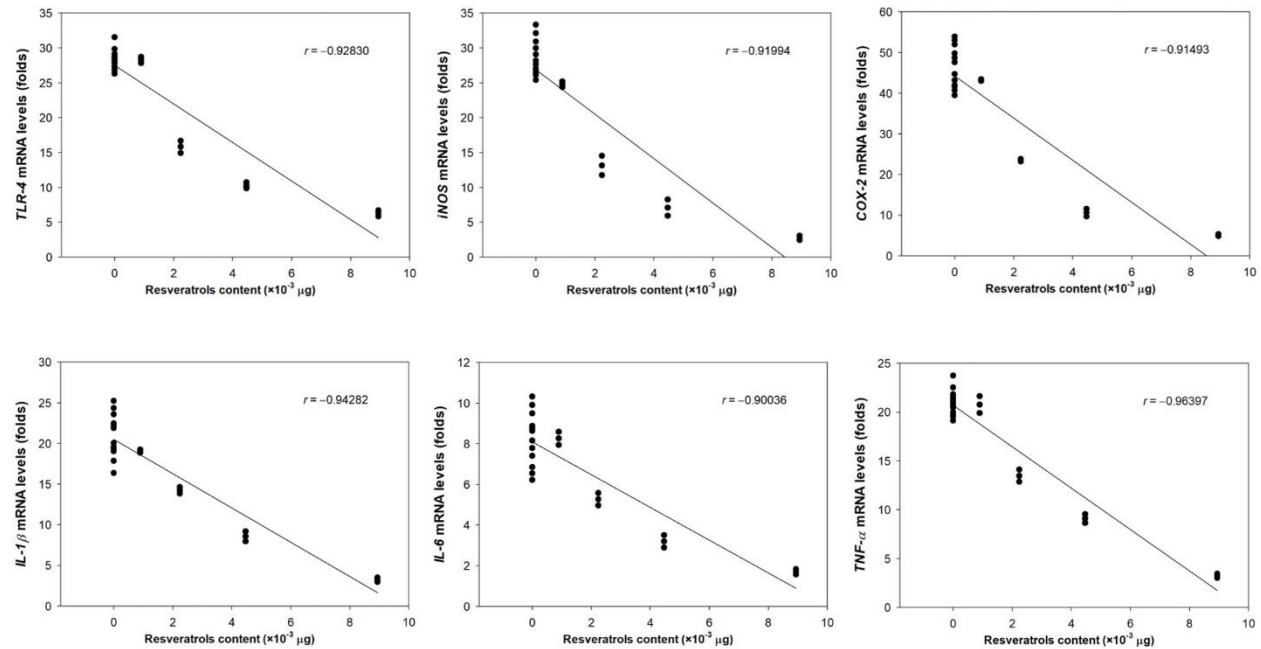

**Figure S6.** Pearson's correlation analyses between the amount of resveratrol (piceid + resveratrol) and nitric oxide production (degree of freedom = 22 and  $p = 0.01$ )

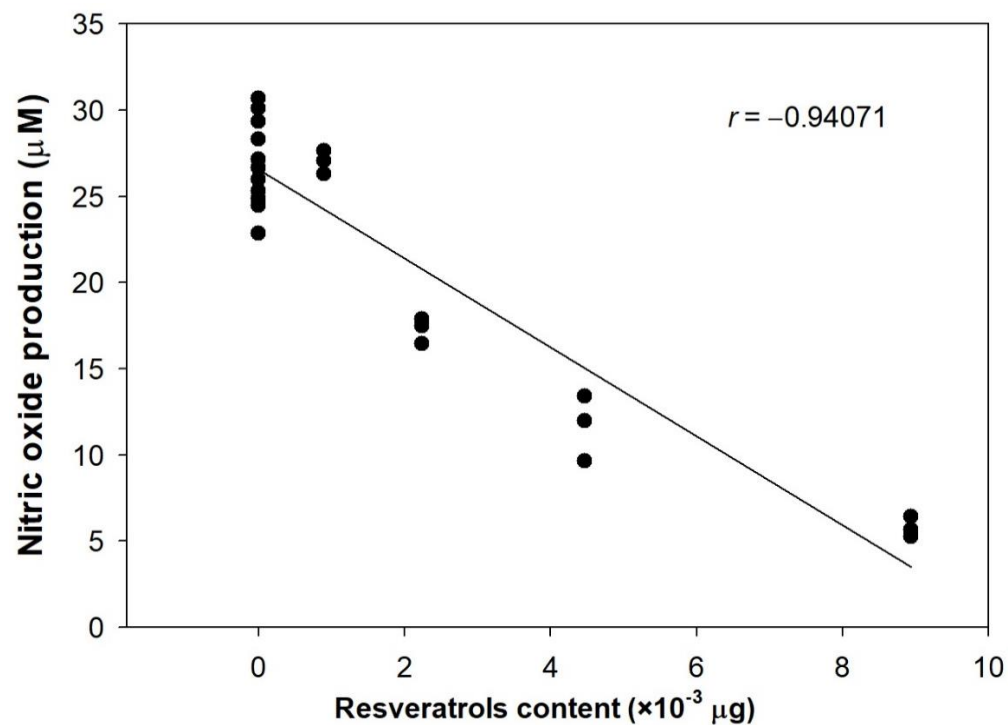

**Figure S7.** Pearson`s correlation analyses between the amount of resveratrol (piceid + resveratrol) and PGE<sub>2</sub> production (degree of freedom = 22 and  $p = 0.01$ )

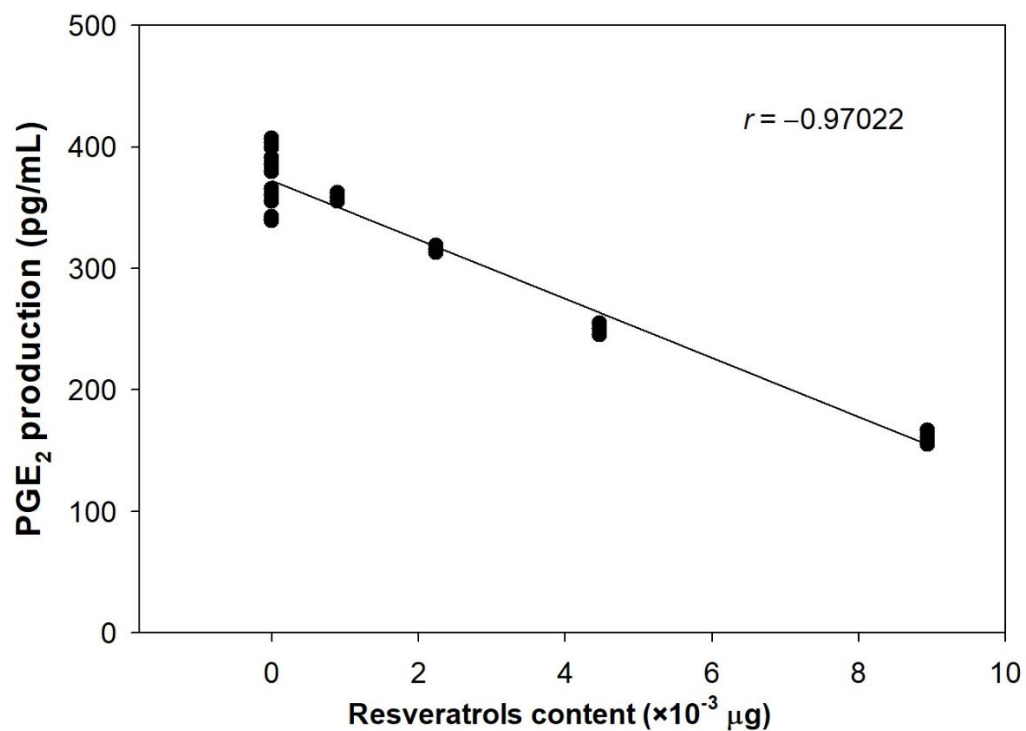

**Table S1.** Cell viability assay results using the EZ-Cytox Cell Viability Assay Kit

| Treatment       | Absorbance at 450 nm |       |       | Mean  | StDev | % Mean | % StDev |
|-----------------|----------------------|-------|-------|-------|-------|--------|---------|
|                 | 1                    | 2     | 3     |       |       |        |         |
| Nontreatment    | 0.910                | 0.950 | 0.949 | 0.936 | 0.023 | 100.00 | 2.44    |
| DMSO            | 0.976                | 1.021 | 0.995 | 0.997 | 0.023 | 106.51 | 2.41    |
| Aspirin         | 0.989                | 1.008 | 0.994 | 0.997 | 0.010 | 106.48 | 1.05    |
| DJ_10 µg/mL     | 0.991                | 1.023 | 0.982 | 0.999 | 0.022 | 106.66 | 2.30    |
| DJ_25 µg/mL     | 0.986                | 0.983 | 0.988 | 0.986 | 0.003 | 105.27 | 0.27    |
| DJ_50 µg/mL     | 0.960                | 0.978 | 1.008 | 0.982 | 0.024 | 104.88 | 2.59    |
| DJ_100 µg/mL    | 0.959                | 0.970 | 1.009 | 0.979 | 0.06  | 104.59 | 2.81    |
| DJ_125 µg/mL    | 0.896                | 0.856 | 0.854 | 0.869 | 0.024 | 92.77  | 2.53    |
| DJ_150 µg/mL    | 0.785                | 0.794 | 0.808 | 0.796 | 0.012 | 84.98  | 1.24    |
| DJ526_10 µg/mL  | 1.033                | 0.996 | 0.998 | 1.009 | 0.021 | 107.76 | 2.22    |
| DJ526_25 µg/mL  | 0.969                | 1.005 | 1.004 | 0.993 | 0.021 | 106.02 | 2.19    |
| DJ526_50 µg/mL  | 0.973                | 0.962 | 1.006 | 0.980 | 0.023 | 104.70 | 2.45    |
| DJ526_100 µg/mL | 0.959                | 0.948 | 0.994 | 0.967 | 0.024 | 103.28 | 2.57    |
| DJ526_125 µg/mL | 0.905                | 0.915 | 0.898 | 0.906 | 0.009 | 96.76  | 0.91    |
| DJ526_150 µg/mL | 0.849                | 0.803 | 0.807 | 0.820 | 0.025 | 87.54  | 2.72    |

**Table S2.** The mRNA levels of pro-inflammatory associated cytokines.

| Treatment | COX-2         |       | IL-1 $\beta$  |       | IL-6          |       | iNOS          |       | TLR-4         |       | TNF- $\alpha$ |       |
|-----------|---------------|-------|---------------|-------|---------------|-------|---------------|-------|---------------|-------|---------------|-------|
|           | Level (folds) | StDev |
| RPMI      | 1.00          | 0.19  | 1.00          | 0.04  | 1.00          | 0.44  | 1.00          | 0.34  | 1.00          | 0.30  | 1.00          | 0.45  |
| LPS       | 32.54         | 1.07  | 20.17         | 1.67  | 16.54         | 2.85  | 23.75         | 2.58  | 14.87         | 0.83  | 16.49         | 2.31  |
| DJ        | 1.44          | 0.36  | 1.97          | 0.14  | 2.30          | 0.10  | 1.04          | 0.10  | 1.26          | 0.16  | 1.69          | 0.57  |
| DJ526     | 2.69          | 0.23  | 3.16          | 0.24  | 6.06          | 0.10  | 1.35          | 0.37  | 1.51          | 0.38  | 4.32          | 0.34  |

**Note:** RAW264.7 cells were treated with the DJ and DJ526 rice callus extracts at the concentration of 100  $\mu$ g/mL. The cells-treated with 1  $\mu$ g/mL of LPS were assigned as the positive control. After 6 h of treatment, the total RNA was extracted from the cells using Tri reagent. The extracted RNA (1000 ng) was used for cDNA synthesis and the cDNA was prepared at the concentration of 5 ng/ $\mu$ L for the Real-Time PCR. The expression of pro-inflammatory mRNA was increased by the treatment of LPS. This expression concludes that the cells are in the good condition.
